# Supplementary material for: Predicted Epitope Abundance Supports Vaccine-Induced Cytotoxic Protection Against SARS-CoV-2 Variants of Concern
Source: Front Immunol. 2021 Nov 25;12:732693. doi: 10.3389/fimmu.2021.732693 (PMC8656262; doi:10.3389/fimmu.2021.732693)
Supplement: Supplementary file 2 [file Table_2.xlsx]

## Sheet: SoC_info
Supplemental Table S2. Strains of concern and of interest considered in this study
Id	Month	Variant	Subvariant	Genomes	Toplocat	Topclade	Top_lin1	Top_lin2	Locat_n	Number of aa changes
1	2021_01	Brasilian	18F_417T_484K_501Y	396	148 Amazonas	383 GR	382	P.1	52	4
2	2021_02	Brasilian	18F_417T_484K_501Y	1267	184 Sao Paulo	1185 GR	1229	P.1	107	4
3	2021_03	Brasilian	18F_417T_484K_501Y	5129	797 Sao Paulo	4683 GR	5087	P.1	140	4
4	2021_03	Brasilian	18F_484K_501Y	641	451 Sao Paulo	595 GR	617	P.1	32	3
5	2021_04	Brasilian	18F_417T_484K_501Y	13278	1390 Illinois	12134 GR	13237	P.1	82	4
6	2021_04	Brasilian	18F_484K_501Y	1096	762 Sao Paulo	1019 GR	1060	P.1	16	3
7	2021_04	Brasilian	18F_417T	120	19 Massachusetts	109 GR	115	P.1	18	2
8	2021_04	Brasilian	5F_18F_417T_484K_501Y	103	31 Ontario	98 GR	102	P.1	16	5
9	2021_05	Brasilian	18F_417T_484K_501Y	12661	1395 Illinois	11567 GR	12644	P.1	-47	4
10	2021_05	Brasilian	18F_484K_501Y	1018	709 Sao Paulo	948 GR	986	P.1	-3	3
11	2021_05	Brasilian	18F_417T	114	20 Massachusetts	103 GR	109	P.1	-4	2
12	2021_05	Brasilian	5F_18F_417T_484K_501Y	104	30 Ontario	97 GR	104	P.1	-3	5
13	2021_05	Brasilian	484K	5211	2096 Japan	4670 GR	3654	R.1	-50	1
14	2021_01	British	69X_70X_144X_501Y	80901	62604 England	80410 GRY	80873	B.1.1.7	472	4
15	2021_01	British	5F_69X_70X_144X_501Y	2535	798 England	2527 GRY	2535	B.1.1.7	68	5
16	2021_01	British	18F_69X_70X_144X_501Y	1913	1447 England	1910 GRY	1912	B.1.1.7	12	5
17	2021_01	British	69X_70X_144X	908	731 England	883 GR	891	B.1.1.7	41	3
18	2021_01	British	69X_70X_144X_501Y	824	300 England	798 GR	818	B.1.1.7	25	4
19	2021_01	British	69X_70X_501Y	557	253 England	541 GR	537	B.1.1.7	73	3
20	2021_01	British	69X_70X_144X_501Y_939F	303	284 England	301 GRY	303	B.1.1.7	12	5
21	2021_01	British	69X_70X_144X_501Y	258	59 Ghana	251 GR	255	B.1.1.7	40	4
22	2021_01	British	69X_70X_501Y	219	69 Dublin	198 GR	213	B.1.1.7	15	3
23	2021_01	British	69X_70X_144X_501Y_831V	197	168 England	197 GRY	197	B.1.1.7	7	5
24	2021_01	British	69X_70X_144X_501Y_675H	119	105 England	118 GRY	119	B.1.1.7	6	5
25	2021_01	British	144X_501Y	106	78 Turkey	82 GR	93	B.1.1.7	15	2
26	2021_01	British	69X_70X_144X_501Y_1263L	104	97 England	104 GRY	104	B.1.1.7	3	5
27	2021_02	British	69X_70X_144X_501Y	174678	101914 England	172837 GRY	174608	B.1.1.7	458	4
28	2021_02	British	5F_69X_70X_144X_501Y	6065	1609 England	6035 GRY	6064	B.1.1.7	112	5
29	2021_02	British	18F_69X_70X_144X_501Y	3098	2336 England	3092 GRY	3097	B.1.1.7	30	5
30	2021_02	British	69X_70X_144X_501Y	2663	1203 Ontario	2625 GR	2659	B.1.1.7	23	4
31	2021_02	British	69X_70X_144X	2065	1122 England	1945 GR	2010	B.1.1.7	58	3
32	2021_02	British	69X_70X_501Y	1059	411 England	1020 GR	1017	B.1.1.7	69	3
33	2021_02	British	69X_70X_501Y	971	399 Michigan	933 GR	952	B.1.1.7	18	3
34	2021_02	British	69X_70X_144X_501Y	637	63 Hasselt	600 GR	625	B.1.1.7	65	4
35	2021_02	British	69X_70X_144X_501Y_939F	480	340 England	474 GRY	480	B.1.1.7	24	5
36	2021_02	British	69X_70X_144X_501Y	429	68 England	388 GR	428	B.1.1.7	36	4
37	2021_02	British	69X_70X_144X_501Y_831V	371	289 England	371 GRY	371	B.1.1.7	10	5
38	2021_02	British	69X_70X_144X_501Y_675H	229	191 England	228 GRY	229	B.1.1.7	11	5
39	2021_02	British	69X_70X_144X_501Y_1263L	219	188 England	219 GRY	219	B.1.1.7	14	5
40	2021_02	British	144X_501Y	219	98 Turkey	170 GR	198	B.1.1.7	23	2
41	2021_02	British	69X_70X_144X_501Y_681R	175	33 England	174 GRY	175	B.1.1.7	23	5
42	2021_02	British	69X_70X_144X_385N_501Y	173	158 England	172 GRY	173	B.1.1.7	9	5
43	2021_02	British	69X_70X_144X_490L_501Y	164	137 England	163 GRY	164	B.1.1.7	12	5
44	2021_02	British	5F_69X_70X_144X_490L_501Y	133	45 Israel	133 GRY	133	B.1.1.7	4	6
45	2021_02	British	69X_70X_144X_384L_501Y	123	108 England	123 GRY	123	B.1.1.7	7	5
46	2021_02	British	69X_70X_144X_367F_501Y	117	45 Scotland	117 GRY	117	B.1.1.7	4	5
47	2021_02	British	69X_70X_144X_354D_501Y	111	109 England	111 GRY	111	B.1.1.7	0	5
48	2021_02	British	69X_70X_144X	104	26 Northern Ireland	82 GR	95	B.1.1.7	8	3
49	2021_03	British	69X_70X_144X_501Y	349067	135760 England	345483 GRY	348954	B.1.1.7	350	4
50	2021_03	British	5F_69X_70X_144X_501Y	11232	2665 England	11189 GRY	11228	B.1.1.7	143	5
51	2021_03	British	69X_70X_144X_501Y	5002	1693 Ontario	4933 GR	4997	B.1.1.7	28	4
52	2021_03	British	18F_69X_70X_144X_501Y	4420	3249 England	4409 GRY	4418	B.1.1.7	43	5
53	2021_03	British	501Y	3211	471 Turkey	1467 GR	1179	B.1.1.7	44	1
54	2021_03	British	69X_70X_144X	3069	857 England	2849 GR	2966	B.1.1.7	76	3
55	2021_03	British	69X_70X_501Y	2286	1060 Michigan	2204 GR	2263	B.1.1.7	16	3
56	2021_03	British	69X_70X_144X_501Y	2260	312 Campania	1296 GR	2255	B.1.1.7	170	4
57	2021_03	British	69X_70X_501Y	1816	406 England	1751 GR	1746	B.1.1.7	104	3
58	2021_03	British	69X_70X_144X_501Y	1312	145 Baden-Wurttemberg	1253 GR	1298	B.1.1.7	33	4
59	2021_03	British	69X_70X_144X_501Y_939F	936	460 England	926 GRY	936	B.1.1.7	22	5
60	2021_03	British	70X_144X_501Y	934	460 North Rhine-Westphalia	931 GR	934	B.1.1.7	9	3
61	2021_03	British	69X_70X_144X_501Y_681R	646	147 Ile-de-France	642 GRY	646	B.1.1.7	30	5
62	2021_03	British	69X_70X_144X_484K_501Y	483	207 Tyrol	482 GRY	483	B.1.1.7	44	5
63	2021_03	British	69X_70X_144X_501Y_675H	480	322 England	479 GRY	480	B.1.1.7	14	5
64	2021_03	British	69X_70X_144X_490L_501Y	432	278 England	425 GRY	432	B.1.1.7	41	5
65	2021_03	British	69X_70X_144X_501Y_831V	431	290 England	429 GRY	431	B.1.1.7	14	5
66	2021_03	British	5F_69X_70X_144X_490L_501Y	405	90 Israel	404 GRY	405	B.1.1.7	29	6
67	2021_03	British	69X_70X_144X_384L_501Y	380	317 England	380 GRY	380	B.1.1.7	29	5
68	2021_03	British	144X_501Y	377	104 Turkey	305 GR	345	B.1.1.7	35	2
69	2021_03	British	69X_70X_144X_501Y_1237I	376	95 Thuringia	373 GRY	376	B.1.1.7	31	5
70	2021_03	British	70X_144X_501Y	360	175 North Rhine-Westphalia	360 GR	360	B.1.1.7	4	3
71	2021_03	British	69X_70X_144X_501Y_1263L	355	228 England	355 GRY	355	B.1.1.7	39	5
72	2021_03	British	69X_70X_144X_385N_501Y	287	217 England	285 GRY	287	B.1.1.7	21	5
73	2021_03	British	70X_501Y	210	103 North Rhine-Westphalia	210 GR	210	B.1.1.7	2	2
74	2021_03	British	69X_70X_144X_367F_501Y	198	64 England	198 GRY	198	B.1.1.7	21	5
75	2021_03	British	69X_70X_144X_501Y_943T	196	194 Colorado	195 GRY	195	B.1.1.7	2	5
76	2021_03	British	69X_70X_144X	186	56 Northern Ireland	149 GR	167	B.1.1.7	12	3
77	2021_03	British	70X_144X_501Y	174	67 Germany	168 GR	174	B.1.1.7	11	3
78	2021_03	British	69X_70X_144X_501Y_936Y	165	78 England	163 GRY	165	B.1.1.7	14	5
79	2021_03	British	69X_70X_144X_452R_501Y	149	144 Scotland	149 GRY	149	B.1.1.7	2	5
80	2021_03	British	5F_69X_70X_144X	147	73 Israel	138 GR	144	B.1.1.7	13	4
81	2021_03	British	69X_70X_144X_455F_501Y	144	82 England	144 GRY	144	B.1.1.7	30	5
82	2021_03	British	69X_70X_144X	139	23 England	65 GR	56	B.1.1.7	22	3
83	2021_03	British	69X_70X_144X_501Y_796Y	136	46 Koroska	134 GRY	135	B.1.1.7	17	5
84	2021_03	British	69X_70X_144X_501Y_879S	126	42 England	126 GRY	126	B.1.1.7	23	5
85	2021_03	British	69X_70X_144X_354D_501Y	115	107 England	115 GRY	115	B.1.1.7	3	5
86	2021_03	British	69X_70X_144X_496S_501Y	101	38 England	99 GRY	101	B.1.1.7	15	5
87	2021_04	British	69X_70X_144X_501Y	452145	113880 England	447473 GRY	452005	B.1.1.7	23	4
88	2021_04	British	5F_69X_70X_144X_501Y	13316	2621 England	13247 GRY	13310	B.1.1.7	56	5
89	2021_04	British	69X_70X_144X_501Y	7047	1898 Hovedstaden	6960 GR	7040	B.1.1.7	7	4
90	2021_04	British	69X_70X_144X	4080	601 Minnesota	3773 GR	3937	B.1.1.7	44	3
91	2021_04	British	501Y	4022	556 Michigan	1823 GR	1646	B.1.1.7	21	1
92	2021_04	British	18F_69X_70X_144X_501Y	3297	2165 England	3280 GRY	3296	B.1.1.7	32	5
93	2021_04	British	69X_70X_144X_501Y	3192	354 Campania	1990 GR	3185	B.1.1.7	18	4
94	2021_04	British	69X_70X_501Y	3066	310 North Rhine-Westphalia	2968 GR	2998	B.1.1.7	24	3
95	2021_04	British	69X_70X_501Y	2887	1102 Michigan	2708 GR	2865	B.1.1.7	12	3
96	2021_04	British	69X_70X_144X_501Y	1898	290 Zurich	1729 GR	1876	B.1.1.7	9	4
97	2021_04	British	69X_70X_144X_501Y_939F	1076	310 England	1065 GRY	1076	B.1.1.7	20	5
98	2021_04	British	69X_70X_144X_501Y_681R	1024	250 Massachusetts	1019 GRY	1024	B.1.1.7	13	5
99	2021_04	British	70X_144X_501Y	945	460 North Rhine-Westphalia	944 GR	945	B.1.1.7	2	3
100	2021_04	British	5F_69X_70X_144X_490L_501Y	940	237 Nordjylland	938 GRY	940	B.1.1.7	21	6
101	2021_04	British	69X_70X_144X_484K_501Y	780	213 Tyrol	773 GRY	777	B.1.1.7	37	5
102	2021_04	British	69X_70X_144X_490L_501Y	766	283 England	750 GRY	766	B.1.1.7	39	5
103	2021_04	British	69X_70X_144X_501Y_1237I	642	180 Germany	638 GRY	642	B.1.1.7	35	5
104	2021_04	British	69X_70X_144X_501Y_675H	551	279 England	551 GRY	551	B.1.1.7	23	5
105	2021_04	British	144X_501Y	479	37 Washington	404 GR	436	B.1.1.7	26	2
106	2021_04	British	69X_70X_144X_501Y_1263L	453	221 England	449 GRY	453	B.1.1.7	26	5
107	2021_04	British	69X_70X_144X_384L_501Y	432	306 England	432 GRY	432	B.1.1.7	17	5
108	2021_04	British	69X_70X_144X_501Y_831V	372	183 England	370 GRY	372	B.1.1.7	14	5
109	2021_04	British	70X_144X_501Y	361	176 North Rhine-Westphalia	361 GR	361	B.1.1.7	0	3
110	2021_04	British	69X_70X_144X_367L_501Y	329	115 Massachusetts	329 GRY	329	B.1.1.7	12	5
111	2021_04	British	69X_70X_144X	320	93 Hovedstaden	275 GR	292	B.1.1.7	8	3
112	2021_04	British	69X_70X_144X_385N_501Y	301	165 England	299 GRY	301	B.1.1.7	19	5
113	2021_04	British	69X_70X_144X_501Y_936Y	271	123 Midtjylland	270 GRY	271	B.1.1.7	16	5
114	2021_04	British	69X_70X_144X_501Y_943T	266	263 Colorado	265 GRY	265	B.1.1.7	1	5
115	2021_04	British	69X_70X_144X_455F_501Y	260	131 England	260 GRY	260	B.1.1.7	18	5
116	2021_04	British	69X_70X_144X_452R_501Y	242	225 Scotland	241 GRY	241	B.1.1.7	5	5
117	2021_04	British	69X_70X_144X_367F_501Y	231	68 England	231 GRY	231	B.1.1.7	21	5
118	2021_04	British	70X_501Y	218	108 North Rhine-Westphalia	218 GR	217	B.1.1.7	0	2
119	2021_04	British	69X_70X_144X_501Y_796Y	200	61 Koroska	198 GRY	199	B.1.1.7	15	5
120	2021_04	British	69X_70X_144X_501Y_879S	193	48 Apulia	192 GRY	193	B.1.1.7	27	5
121	2021_04	British	70X_144X_501Y	178	76 Germany	171 GR	178	B.1.1.7	0	3
122	2021_04	British	69X_70X_144X_452M_501Y	159	36 Hovedstaden	159 GRY	159	B.1.1.7	16	5
123	2021_04	British	5F_69X_70X_144X	150	58 Israel	137 GR	145	B.1.1.7	4	4
124	2021_04	British	69X_70X_144X_354K_501Y	149	69 Germany	148 GRY	149	B.1.1.7	2	5
125	2021_04	British	69X_70X_144X_496S_501Y	142	37 Saxony	141 GRY	142	B.1.1.7	11	5
126	2021_04	British	5F_501Y	132	32 Michigan	68 GR	62	B.1.1.7	11	2
127	2021_04	British	69X_70X_144X	122	15 North Rhine-Westphalia	57 GR	51	B.1.1.7	-2	3
128	2021_04	British	5F_18F_69X_70X_144X_501Y	108	28 Groningen	108 GRY	108	B.1.1.7	0	6
129	2021_04	British	69X_70X_144X_475V_501Y	106	26 England	105 GRY	106	B.1.1.7	13	5
130	2021_04	British	70X_144X_501Y	100	95 Germany	96 GR	100	B.1.1.7	1	3
131	2021_05	British	69X_70X_144X_501Y	363422	74261 England	360015 GRY	363321	B.1.1.7	-241	4
132	2021_05	British	5F_69X_70X_144X_501Y	9966	1852 England	9915 GRY	9961	B.1.1.7	-38	5
133	2021_05	British	69X_70X_144X_501Y	5538	1935 Hovedstaden	5466 GR	5533	B.1.1.7	-11	4
134	2021_05	British	501Y	3142	533 Michigan	1478 GR	1459	B.1.1.7	-48	1
135	2021_05	British	69X_70X_144X	2988	490 Minnesota	2771 GR	2882	B.1.1.7	-38	3
136	2021_05	British	69X_70X_144X_501Y	2864	290 Campania	1698 GR	2858	B.1.1.7	-15	4
137	2021_05	British	69X_70X_501Y	2626	299 North Rhine-Westphalia	2546 GR	2578	B.1.1.7	-32	3
138	2021_05	British	18F_69X_70X_144X_501Y	2156	1311 England	2142 GRY	2155	B.1.1.7	-15	5
139	2021_05	British	69X_70X_501Y	2139	735 Michigan	1977 GR	2130	B.1.1.7	-7	3
140	2021_05	British	69X_70X_144X_501Y	1519	290 Zurich	1381 GR	1506	B.1.1.7	-40	4
141	2021_05	British	69X_70X_144X_501Y_681R	937	258 Massachusetts	932 GRY	937	B.1.1.7	-14	5
142	2021_05	British	70X_144X_501Y	930	459 North Rhine-Westphalia	930 GR	930	B.1.1.7	-6	3
143	2021_05	British	69X_70X_144X_501Y_939F	885	229 England	878 GRY	885	B.1.1.7	-11	5
144	2021_05	British	5F_69X_70X_144X_490L_501Y	871	258 Nordjylland	869 GRY	871	B.1.1.7	0	6
145	2021_05	British	69X_70X_144X_484K_501Y	768	213 Tyrol	760 GRY	765	B.1.1.7	-4	5
146	2021_05	British	69X_70X_144X_490L_501Y	695	227 England	680 GRY	695	B.1.1.7	-6	5
147	2021_05	British	69X_70X_144X_501Y_1237I	603	180 Germany	599 GRY	603	B.1.1.7	-3	5
148	2021_05	British	69X_70X_144X_501Y_675H	472	220 England	472 GRY	472	B.1.1.7	-3	5
149	2021_05	British	144X_501Y	390	36 Washington	337 GR	350	B.1.1.7	-13	2
150	2021_05	British	69X_70X_144X_384L_501Y	357	241 England	357 GRY	357	B.1.1.7	0	5
151	2021_05	British	70X_144X_501Y	354	174 North Rhine-Westphalia	354 GR	354	B.1.1.7	-1	3
152	2021_05	British	69X_70X_144X_501Y_1263L	350	132 England	346 GRY	350	B.1.1.7	-8	5
153	2021_05	British	69X_70X_144X_367L_501Y	349	146 Massachusetts	349 GRY	349	B.1.1.7	1	5
154	2021_05	British	69X_70X_144X_501Y_943T	265	263 Colorado	264 GRY	264	B.1.1.7	-1	5
155	2021_05	British	69X_70X_144X	261	93 Hovedstaden	229 GR	238	B.1.1.7	-5	3
156	2021_05	British	69X_70X_144X_501Y_936Y	249	125 Midtjylland	249 GRY	249	B.1.1.7	-1	5
157	2021_05	British	69X_70X_144X_452R_501Y	244	227 Scotland	243 GRY	243	B.1.1.7	0	5
158	2021_05	British	69X_70X_144X_455F_501Y	244	120 England	244 GRY	244	B.1.1.7	-4	5
159	2021_05	British	69X_70X_144X_385N_501Y	207	83 England	206 GRY	207	B.1.1.7	-4	5
160	2021_05	British	69X_70X_144X_501Y_831V	200	62 England	198 GRY	200	B.1.1.7	-5	5
161	2021_05	British	70X_501Y	199	100 North Rhine-Westphalia	199 GR	198	B.1.1.7	-1	2
162	2021_05	British	69X_70X_144X_452M_501Y	181	59 Hovedstaden	181 GRY	181	B.1.1.7	-2	5
163	2021_05	British	69X_70X_144X_367F_501Y	170	55 England	170 GRY	170	B.1.1.7	-4	5
164	2021_05	British	69X_70X_144X_501Y_796Y	168	61 Koroska	168 GRY	168	B.1.1.7	-2	5
165	2021_05	British	69X_70X_144X_501Y_879S	167	40 England	166 GRY	167	B.1.1.7	-2	5
166	2021_05	British	70X_144X_501Y	159	76 Germany	152 GR	159	B.1.1.7	-2	3
167	2021_05	British	69X_70X_144X_496S_501Y	131	36 Saxony	130 GRY	131	B.1.1.7	-2	5
168	2021_05	British	69X_70X_144X_354K_501Y	128	69 Germany	127 GRY	128	B.1.1.7	0	5
169	2021_05	British	5F_501Y	109	32 Michigan	54 GR	54	B.1.1.7	-4	2
170	2021_05	British	70X_144X_501Y	100	95 Germany	96 GR	100	B.1.1.7	0	3
171	2021_01	Californian	452R	9716	5930 California	8710 GH	5464	B.1.429	126	1
172	2021_01	Californian	5F_452R	143	100 California	127 GH	96	B.1.429	17	2
173	2021_02	Californian	452R	19366	10641 California	17724 GH	11537	B.1.429	76	1
174	2021_02	Californian	5F_452R	372	226 California	354 GH	231	B.1.429	14	2
175	2021_04	Californian	452R_503I	129	51 Minnesota	129 GH	128	B.1.427	1	2
176	2021_04	Californian	452R	27348	10291 California	25575 GH	17552	B.1.429	-57	1
177	2021_04	Californian	5F_452R	585	260 California	578 GH	301	B.1.429	0	2
178	2021_04	Californian	452R_522P	228	195 Michigan	225 GH	224	B.1.429	0	2
179	2021_04	Californian	69X_70X_452R	139	22 California	124 GH	79	B.1.429	8	3
180	2021_03	Indian	452R_484Q_681R	1174	706 Maharashtra	1172 G	1098	B.1.617.1	39	3
181	2021_03	Indian	452R_478K_681R	203	71 Maharashtra	203 G	177	B.1.617.2	22	3
182	2021_04	Indian	452R_484Q_681R	1896	760 Maharashtra	1891 G	1777	B.1.617.1	52	3
183	2021_04	Indian	452R_478K_681R	2656	1029 England	2652 G	2528	B.1.617.2	120	3
184	2021_05	Californian	452R_503I	128	51 Minnesota	128 GH	127	B.1.427	-1	2
185	2021_05	Californian	452R	17443	5329 California	16324 GH	11292	B.1.429	-77	1
186	2021_05	Californian	5F_452R	359	134 California	355 GH	167	B.1.429	-11	2
187	2021_05	Californian	452R_522P	203	180 Michigan	201 GH	200	B.1.429	-4	2
188	2021_05	Californian	69X_70X_452R	114	19 Minnesota	100 GH	63	B.1.429	-4	3
189	2021_05	Indian	452R_484Q_681R	1546	420 Maharashtra	1541 G	1452	B.1.617.1	1	3
190	2021_05	Indian	452R_478K_681R	3479	1717 England	3474 G	3349	B.1.617.2	11	3
191	2021_01	New York	5F_484K	299	212 New York	273 GH	266	B.1.526	30	2
192	2021_01	New York	144X_452R	179	152 New York	167 GH	141	B.1.526.1	12	2
193	2021_02	New York	5F_484K	1489	1187 New York	1442 GH	1419	B.1.526	27	2
194	2021_02	New York	144X_452R	670	501 New York	645 GH	562	B.1.526.1	23	2
195	2021_02	New York	5F_477N	898	652 New York	877 GH	582	B.1.526.2	22	2
196	2021_03	New York	5F_484K	6295	3008 New York	6166 GH	6109	B.1.526	12	2
197	2021_03	New York	144X_452R	2930	1238 New York	2886 GH	2656	B.1.526.1	28	2
198	2021_03	New York	5F_144X_452R	103	45 New York	103 GH	94	B.1.526.1	5	3
199	2021_03	New York	5F_477N	3512	1759 New York	3481 GH	2648	B.1.526.2	20	2
200	2021_03	New York	5F_18F_477N	174	65 New York	174 GH	171	B.1.526.2	14	3
201	2021_04	New York	5F_484K	12656	4458 New York	12476 GH	12353	B.1.526	22	2
202	2021_04	New York	5F_144X_484K	176	73 New York	166 GH	160	B.1.526	7	3
203	2021_04	New York	144X_452R	5616	1676 New York	5562 GH	5087	B.1.526.1	7	2
204	2021_04	New York	5F_144X_452R	189	48 New York	189 GH	177	B.1.526.1	9	3
205	2021_04	New York	5F_477N	7714	2646 New York	7675 GH	5835	B.1.526.2	-12	2
206	2021_04	New York	5F_18F_477N	396	115 Colorado	394 GH	386	B.1.526.2	13	3
207	2021_05	New York	5F_484K	11591	3521 New York	11435 GH	11326	B.1.526	-7	2
208	2021_05	New York	5F_144X_484K	161	60 New York	159 GH	155	B.1.526	-1	3
209	2021_05	New York	144X_452R	5166	1339 New York	5125 GH	4701	B.1.526.1	-9	2
210	2021_05	New York	5F_144X_452R	169	33 Michigan	169 GH	159	B.1.526.1	1	3
211	2021_05	New York	5F_477N	7204	2158 New York	7178 GH	5456	B.1.526.2	-18	2
212	2021_05	New York	5F_18F_477N	372	112 Colorado	370 GH	362	B.1.526.2	0	3
213	2021_01	Nigerian	69X_70X_144X_484K	245	40 England	244 G	237	B.1.525	53	4
214	2021_02	Nigerian	69X_70X_144X_484K	742	117 England	735 G	713	B.1.525	68	4
215	2021_03	Nigerian	69X_70X_144X_484K	2135	391 Syddanmark	2110 G	2048	B.1.525	61	4
216	2021_04	Nigerian	69X_70X_144X_484K	2935	405 Syddanmark	2883 G	2786	B.1.525	13	4
217	2021_05	Nigerian	69X_70X_144X_484K	2466	321 Syddanmark	2419 G	2335	B.1.525	-25	4
218	2021_01	South_African	242X_243X_244X_417N_484K_501Y	1328	224 Western Cape	1310 GH	1325	B.1.351	99	6
219	2021_01	South_African	18F_242X_243X_244X_417N_484K_501Y	1230	255 Mamoudzou	1208 GH	1230	B.1.351	90	7
220	2021_01	South_African	242X_243X_244X_417N_484K_501Y_879S	156	132 Tyrol	156 GH	156	B.1.351	3	7
221	2021_01	South_African	417N_484K_501Y	124	80 Gauteng	123 GH	123	B.1.351	11	3
222	2021_02	South_African	18F_242X_243X_244X_417N_484K_501Y	2301	264 Mamoudzou	2271 GH	2298	B.1.351	120	7
223	2021_02	South_African	242X_243X_244X_417N_484K_501Y	2186	202 KwaZulu-Natal	2149 GH	2182	B.1.351	91	6
224	2021_02	South_African	417N_484K_501Y	166	89 Gauteng	165 GH	165	B.1.351	12	3
225	2021_02	South_African	242X_243X_244X_417N_484K_501Y_879S	164	133 Tyrol	164 GH	164	B.1.351	5	7
226	2021_02	South_African	242X_243X_244X_417N	160	30 Zimbabwe	154 GH	147	B.1.351	12	4
227	2021_02	South_African	18F_417N_484K_501Y	128	42 Gauteng	127 GH	127	B.1.351	8	4
228	2021_02	South_African	242X_243X_244X_484K_501Y	104	64 Uusimaa	99 GH	65	B.1.351	18	5
229	2021_02	South_African	18F_242X_243X_244X_417N	100	25 Reunion	99 GH	96	B.1.351	10	5
230	2021_03	South_African	18F_242X_243X_244X_417N_484K_501Y	4221	427 Luxembourg	4183 GH	4203	B.1.351	102	7
231	2021_03	South_African	242X_243X_244X_417N_484K_501Y	3665	304 Stockholm	3597 GH	3604	B.1.351	81	6
232	2021_03	South_African	242X_243X_244X_417N	251	54 Doha	242 GH	205	B.1.351	11	4
233	2021_03	South_African	18F_242X_243X_244X_417N	234	48 Reunion	231 GH	223	B.1.351	29	5
234	2021_03	South_African	417N_484K_501Y	196	87 Gauteng	190 GH	188	B.1.351	14	3
235	2021_03	South_African	242X_243X_244X_484K_501Y	182	96 Uusimaa	165 GH	113	B.1.351	10	5
236	2021_03	South_African	242X_243X_244X_417N_484K_501Y_879S	171	135 Tyrol	171 GH	171	B.1.351	3	7
237	2021_03	South_African	18F_417N_484K_501Y	162	38 Gauteng	161 GH	161	B.1.351	16	4
238	2021_03	South_African	18F_242X_243X_244X_417N_484K_501Y	140	19 Menen	137 GH	140	B.1.351	12	7
239	2021_03	South_African	242X_243X_244X_417N_484K_501Y	132	117 Bavaria	132 GH	132	B.1.351	0	6
240	2021_03	South_African	5F_18F_242X_243X_244X_417N_484K_501Y	112	68 Viken	112 GH	112	B.1.351	8	8
241	2021_03	South_African	18F_242X_243X_244X_384L_417N_484K_501Y	100	29 Luxembourg	100 GH	100	B.1.351	17	8
242	2021_04	South_African	18F_242X_243X_244X_417N_484K_501Y	4551	555 Luxembourg	4529 GH	4530	B.1.351	-8	7
243	2021_04	South_African	242X_243X_244X_417N_484K_501Y	4011	331 Stockholm	3933 GH	3943	B.1.351	1	6
244	2021_04	South_African	242X_243X_244X_417N	276	54 Doha	267 GH	228	B.1.351	6	4
245	2021_04	South_African	18F_242X_243X_244X_417N	273	52 Reunion	269 GH	260	B.1.351	11	5
246	2021_04	South_African	242X_243X_244X_484K_501Y	204	89 Uusimaa	177 GH	129	B.1.351	4	5
247	2021_04	South_African	18F_242X_243X_244X_384L_417N_484K_501Y	199	40 Luxembourg	199 GH	199	B.1.351	16	8
248	2021_04	South_African	242X_243X_244X_417N_484K_501Y	155	126 Bavaria	155 GH	155	B.1.351	2	6
249	2021_04	South_African	417N_484K_501Y	142	18 Ile-de-France	135 GH	134	B.1.351	2	3
250	2021_04	South_African	18F_242X_243X_244X_417N_484K_501Y	140	19 Menen	137 GH	140	B.1.351	0	7
251	2021_04	South_African	18F_417N_484K_501Y	130	20 Bourgogne-Franche-Comte	128 GH	126	B.1.351	3	4
252	2021_04	South_African	18F_242X_243X_244X_484K_501Y	127	34 Saarland	127 GH	122	B.1.351	0	6
253	2021_04	South_African	5F_18F_242X_243X_244X_417N_484K_501Y	123	80 Viken	123 GH	123	B.1.351	0	8
254	2021_04	South_African	5F_242X_243X_244X_417N_484K_501Y	101	32 Stockholm	99 GH	100	B.1.351	2	7
255	2021_05	South_African	18F_242X_243X_244X_417N_484K_501Y	3432	445 Luxembourg	3419 GH	3414	B.1.351	-83	7
256	2021_05	South_African	242X_243X_244X_417N_484K_501Y	2993	239 Ile-de-France	2935 GH	2927	B.1.351	-61	6
257	2021_05	South_African	18F_242X_243X_244X_417N	217	33 Reunion	213 GH	206	B.1.351	-8	5
258	2021_05	South_African	242X_243X_244X_417N	192	30 Doha	188 GH	154	B.1.351	-5	4
259	2021_05	South_African	18F_242X_243X_244X_384L_417N_484K_501Y	178	40 Luxembourg	178 GH	178	B.1.351	-8	8
260	2021_05	South_African	242X_243X_244X_484K_501Y	125	32 Uusimaa	101 GH	86	B.1.351	-14	5
261	2021_01	Other	367F_681R	385	112 Uganda	385 S	383	A.23.1	26	2
262	2021_01	Other	501Y	855	388 Wales	592 GR	406	AP.1	45	1
263	2021_01	Other	477N_939F	133	53 Syddanmark	84 G	79	B.1	9	2
264	2021_01	Other	69X_70X	128	40 Bavaria	73 G	46	B.1	9	2
265	2021_01	Other	69X_70X_453F	623	282 Midtjylland	579 GR	591	B.1.1.298	0	3
266	2021_01	Other	477N	17526	2245 Hovedstaden	15571 GH	10878	B.1.160	94	1
267	2021_01	Other	5F_477N	297	133 New York	288 GH	116	B.1.160	24	2
268	2021_01	Other	144X_477N	179	75 Hovedstaden	174 GH	138	B.1.160.24	12	2
269	2021_01	Other	5F_18F	700	419 England	681 GV	527	B.1.177	18	2
270	2021_01	Other	18F_939F	166	125 England	151 GV	137	B.1.177	6	2
271	2021_01	Other	18F_936Y	306	73 North Rhine-Westphalia	304 GV	291	B.1.177.62	26	2
272	2021_01	Other	18F_144X	211	58 England	203 GV	140	B.1.177.80	13	2
273	2021_01	Other	69X_70X_439K	8549	1798 Hovedstaden	8476 G	4126	B.1.258	94	3
274	2021_01	Other	439K	2913	391 England	2610 G	1467	B.1.258	58	1
275	2021_01	Other	69X_70X_439K	112	42 Slovenia	108 G	52	B.1.258	7	3
276	2021_01	Other	69X_70X	998	158 Florida	570 GH	505	B.1.375	49	2
277	2021_01	Other	439K_681R	105	19 Jakarta	102 GH	103	B.1.466.2	17	2
278	2021_01	Other	484K	2022	414 Japan	1770 GR	902	P.2	107	1
279	2021_02	Other	367F_681R	446	99 Uganda	445 S	444	A.23.1	40	2
280	2021_02	Other	18F_452R_501Y_796Y	251	42 Auvergne-Rhone-Alpes	251 S	231	A.27	26	4
281	2021_02	Other	69X_70X	290	68 Bavaria	91 G	98	B.1	24	2
282	2021_02	Other	417N_501Y	202	195 Turkey	100 GH	171	B.1	0	2
283	2021_02	Other	477N_939F	124	52 Syddanmark	74 G	70	B.1	3	2
284	2021_02	Other	144X	125	16 Bavaria	41 GR	18	B.1.1	15	1
285	2021_02	Other	144X_484K_796H	106	29 England	104 GR	70	B.1.1.318	17	3
286	2021_02	Other	18F_440K	238	46 Luxembourg	212 GR	211	B.1.1.420	27	2
287	2021_02	Other	5F_478K	140	55 Texas	136 GR	135	B.1.1.519	16	2
288	2021_02	Other	477N	17217	1688 Hovedstaden	15025 GH	11081	B.1.160	114	1
289	2021_02	Other	69X_70X_501T	196	49 Hauts-de-France	195 S	116	B.1.160	9	3
290	2021_02	Other	18F_477N	109	11 Hasselt	93 GH	91	B.1.160	13	2
291	2021_02	Other	477N_675H	105	34 Bretagne	104 GH	98	B.1.160	4	2
292	2021_02	Other	144X_477N	180	73 Hovedstaden	173 GH	132	B.1.160.24	6	2
293	2021_02	Other	5F_18F	638	250 England	610 GV	390	B.1.177	26	2
294	2021_02	Other	18F_939F	129	89 England	114 GV	95	B.1.177	4	2
295	2021_02	Other	18F_936Y	571	211 North Rhine-Westphalia	566 GV	557	B.1.177.62	8	2
296	2021_02	Other	18F_144X	234	40 Rogaland	225 GV	144	B.1.177.80	8	2
297	2021_02	Other	501Y	1520	337 Turkey	708 GR	375	B.1.2	61	1
298	2021_02	Other	69X_70X_439K	10068	1301 Hovedstaden	9965 G	4360	B.1.258	48	3
299	2021_02	Other	439K	3657	516 Campania	3184 G	1973	B.1.258	54	1
300	2021_02	Other	69X_70X_439K	203	97 Slovenia	192 G	110	B.1.258.17	10	3
301	2021_02	Other	69X_70X	1248	166 Florida	635 GH	550	B.1.375	15	2
302	2021_02	Other	439K_681R	192	34 Jakarta	189 GH	186	B.1.466.2	6	2
303	2021_02	Other	452R_484Q_681R	397	362 Maharashtra	396 G	368	B.1.617.1	9	3
304	2021_02	Other	484K	3975	882 Japan	3480 GR	1518	R.1	43	1
305	2021_03	Other	367F_681R	308	50 Kigali	307 S	307	A.23.1	5	2
306	2021_03	Other	18F_452R_501Y_796Y	326	61 Auvergne-Rhone-Alpes	326 S	315	A.27	10	4
307	2021_03	Other	69X_70X	450	119 Bavaria	175 O	139	B.1	15	2
308	2021_03	Other	417N_501Y	211	199 Turkey	103 GH	175	B.1	5	2
309	2021_03	Other	242X_243X_244X_417N_501Y	145	97 Turkey	119 GH	75	B.1	15	5
310	2021_03	Other	144X	147	22 Bavaria	53 GR	23	B.1.1	4	1
311	2021_03	Other	144X_484K	110	22 Saint Petersburg	70 GR	31	B.1.1	21	2
312	2021_03	Other	144X_484K_796H	551	105 England	543 GR	369	B.1.1.318	70	3
313	2021_03	Other	18F_440K	391	106 Luxembourg	362 GR	346	B.1.1.420	16	2
314	2021_03	Other	5F_478K	420	120 Michigan	414 GR	408	B.1.1.519	17	2
315	2021_03	Other	477N	13493	795 Hovedstaden	11300 GH	8771	B.1.160	-22	1
316	2021_03	Other	69X_70X_501T	235	79 Hauts-de-France	231 S	155	B.1.160	6	3
317	2021_03	Other	477N_675H	111	33 Bretagne	110 GH	103	B.1.160	-3	2
318	2021_03	Other	144X_477N	109	43 Sjaelland	103 GH	66	B.1.160.24	-5	2
319	2021_03	Other	5F_18F	601	153 England	539 GV	266	B.1.177	8	2
320	2021_03	Other	18F_939F	109	46 England	95 GV	47	B.1.177	5	2
321	2021_03	Other	18F_936Y	653	252 North Rhine-Westphalia	649 GV	640	B.1.177.62	2	2
322	2021_03	Other	18F_144X	207	40 Midtjylland	196 GV	126	B.1.177.80	2	2
323	2021_03	Other	439K	3101	403 Campania	2647 G	1819	B.1.258	-10	1
324	2021_03	Other	69X_70X_439K	9006	705 Gorenjska	8900 G	4595	B.1.258.17	-25	3
325	2021_03	Other	69X_70X_439K	316	191 Slovenia	296 G	220	B.1.258.17	3	3
326	2021_03	Other	69X_70X	1225	144 Turkey	467 GH	383	B.1.375	-10	2
327	2021_03	Californian	452R	29360	13759 California	27254 GH	18135	B.1.429	19	1
328	2021_03	Californian	5F_452R	579	331 California	565 GH	326	B.1.429	16	2
329	2021_03	Californian	452R_522P	162	135 Michigan	160 GH	159	B.1.429	8	2
330	2021_03	Californian	69X_70X_452R	110	24 California	101 GH	59	B.1.429	17	3
331	2021_03	Californian	452R_1263L	100	77 California	100 GH	89	B.1.429	1	2
332	2021_03	Other	439K_681R	330	58 West Java	325 GH	316	B.1.466.2	10	2
333	2021_03	Other	440K_484K_939F	160	22 Turkey	160 G	160	B.1.619	28	3
334	2021_03	Other	452Q_490L	266	59 Region Metropolitana de Santiago	266 GR	260	C.37	25	2
335	2021_03	Other	484K_501Y	182	62 Central Visayas	144 GR	111	P.3	21	2
336	2021_03	Other	484K	7569	2693 Japan	6743 GR	4287	R.1	26	1
337	2021_04	Other	449H_501Y	102	51 England	102 S	102	A	3	2
338	2021_04	Other	367F_681R	153	18 England	152 S	152	A.23.1	-14	2
339	2021_04	Other	18F_452R_501Y_796Y	296	58 Auvergne-Rhone-Alpes	296 S	288	A.27	-6	4
340	2021_04	Other	69X_70X	419	103 Bavaria	170 O	116	B.1	-4	2
341	2021_04	Other	417N_501Y	197	185 Turkey	93 GH	164	B.1	3	2
342	2021_04	Other	242X_243X_244X_417N_501Y	151	90 Turkey	129 GH	72	B.1	0	5
343	2021_04	Other	69X_70X	701	143 Turkey	268 GR	194	B.1.1	-19	2
344	2021_04	Other	144X_484K	145	21 Saint Petersburg	101 GR	37	B.1.1	7	2
345	2021_04	Other	144X_484K_796H	1086	161 England	1064 GR	726	B.1.1.318	38	3
346	2021_04	Other	144X_484K_796H	209	196 Ontario	209 GR	204	B.1.1.318	6	3
347	2021_04	Other	18F_440K	365	108 Luxembourg	350 GR	327	B.1.1.420	-10	2
348	2021_04	Other	5F_478K	513	152 Michigan	506 GR	500	B.1.1.519	4	2
349	2021_04	Other	144X_478K	119	53 Alaska	118 GR	113	B.1.1.519	4	2
350	2021_04	Other	477N	6819	468 Bavaria	5174 GH	4360	B.1.160	-129	1
351	2021_04	Other	69X_70X_501T	196	80 Hauts-de-France	191 S	157	B.1.160	-5	3
352	2021_04	Other	5F_18F	403	71 Vilniaus apskritis	333 GV	156	B.1.177.60	-1	2
353	2021_04	Other	18F_936Y	441	211 North Rhine-Westphalia	438 GV	435	B.1.177.62	-15	2
354	2021_04	Other	439K	1818	243 Syddanmark	1478 G	1080	B.1.258	-47	1
355	2021_04	Other	69X_70X_439K	6056	581 Gorenjska	6000 G	3823	B.1.258.17	-99	3
356	2021_04	Other	69X_70X_439K	258	165 Slovenia	242 G	192	B.1.258.17	-8	3
357	2021_04	Other	439K_681R	324	47 Queensland	322 GH	306	B.1.466.2	-1	2
358	2021_04	Other	440K_484K_939F	309	32 North Rhine-Westphalia	308 G	305	B.1.619	19	3
359	2021_04	Other	69X_70X_144X_242X_243X_244X_477N_484K	172	37 Utenos apskritis	172 G	172	B.1.620	22	8
360	2021_04	Other	69X_70X_346S_452R	268	61 England	267 GR	256	C.36	40	4
361	2021_04	Other	452Q_490L	543	93 Region Metropolitana de Santiago	542 GR	527	C.37	34	2
362	2021_04	Other	484K_501Y	217	58 Central Visayas	168 GR	105	P.3	14	2
363	2021_04	Other	484K	7335	2566 Japan	6537 GR	4578	R.1	-31	1
364	2021_05	Other	18F_452R_501Y_796Y	123	21 Ile-de-France	123 S	120	A.27	-20	4
365	2021_05	Other	484K_501Y	139	30 Turkey	95 GR	29	B.1	-11	2
366	2021_05	Other	69X_70X	336	122 Turkey	187 GR	152	B.1.1	-46	2
367	2021_05	Other	144X_484K	120	23 England	84 GR	27	B.1.1	-14	2
368	2021_05	Other	144X_484K_796H	1032	149 England	1011 GR	700	B.1.1.318	-5	3
369	2021_05	Other	144X_484K_796H	208	195 Ontario	208 GR	203	B.1.1.318	0	3
370	2021_05	Other	18F_440K	207	69 Luxembourg	201 GR	186	B.1.1.420	-20	2
371	2021_05	Other	5F_478K	403	145 Michigan	399 GR	394	B.1.1.519	-5	2
372	2021_05	Other	477N	2411	189 Bavaria	1632 GH	1409	B.1.160	-214	1
373	2021_05	Other	5F_18F	217	53 Vilniaus apskritis	156 GV	108	B.1.177.60	-30	2
374	2021_05	Other	18F_936Y	144	61 North Rhine-Westphalia	144 GV	142	B.1.177.62	-15	2
375	2021_05	Other	439K	596	87 Campania	447 G	286	B.1.258	-92	1
376	2021_05	Other	69X_70X_439K	2529	406 Gorenjska	2507 G	1811	B.1.258.17	-122	3
377	2021_05	Other	69X_70X_439K	146	108 Slovenia	137 G	124	B.1.258.17	-15	3
378	2021_05	Other	439K_681R	240	46 Queensland	238 GH	225	B.1.466.2	-7	2
379	2021_05	Other	440K_484K_939F	297	33 North Rhine-Westphalia	296 G	293	B.1.619	-6	3
380	2021_05	Other	69X_70X_144X_242X_243X_244X_477N_484K	172	37 Utenos apskritis	172 G	172	B.1.620	0	8
381	2021_05	Other	69X_70X_346S_452R	274	61 England	273 GR	261	C.36	0	4
382	2021_05	Other	452Q_490L	517	87 Region Metropolitana de Santiago	516 GR	501	C.37	-2	2
